# Supplementary material for: Breeding for Virus Resistance and Its Effects on Deformed Wing Virus Infection Patterns in Honey Bee Queens
Source: MDPI journal article supplement (doi:10.3390/v13061074), 2021-06-04
Supplement: s1 [file s1]

Supplementary Information

# Breeding for Virus Resistance and its Effects on Deformed Wing Virus Infection Patterns in Honey Bee Queens.

David Claeys Bouuaert \*, Lina De Smet and Dirk C. de Graaf

Laboratory of Molecular Entomology and Bee Pathology, Ghent University, Krijgslaan 281, B-9000 Ghent, Belgium; lina.desmet@ugent.be (L.D.S.); Dirk.deGraaf@UGent.be (D.C.d.G.)

\* Correspondence: david.claeysbouuaert@ugent.be

**Citation:** Bouuaert, D.C.; De Smet, L.; de Graaf, D.C. Breeding for Virus Resistance and Its Effects on Deformed Wing Virus Infection Patterns in Honey Bee Queens. *Viruses* **2021**, *13*, 1074. <https://doi.org/10.3390/v13061074>

Academic Editor:  
Miguel López-Ferber

Received: 12 May 2021  
Accepted: 28 May 2021  
Published: 4 June 2021

**Publisher's Note:** MDPI stays neutral with regard to jurisdictional claims in published maps and institutional affiliations.

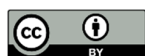

**Copyright:** © 2021 by the authors. Licensee MDPI, Basel, Switzerland. This article is an open access article distributed under the terms and conditions of the Creative Commons Attribution (CC BY) license (<http://creativecommons.org/licenses/by/4.0/>).

**Table S1.** Primer sequences.

| Virus | Primers | Sequence '5-'3                          | Size (bp) | Ref  |
|-------|---------|-----------------------------------------|-----------|------|
| DWV-A | DWV-F   | 5'-TTC ATT AAA GCC ACC TGG AAC ATC-3'   | 136       | [55] |
|       | DWV-R   | 5'-TTT CCT CAT TAA CTG TGT CGT TGA-3'   |           |      |
| DWV-B | VDV-F2  | 5'-TAT CTT CAT TAA AAC CGC CAG GCT-3'   | 140       | [56] |
|       | VDV-R2a | 5'-CTT CCT CAT TAA CTG AGT TGT TGT C-3' |           |      |

Table S2. overview of number of infections and infection loads.

| Status |       | Eviscerated Abdomen |                     | Guts              |                     | Head              |                     | Ovaries           |                     | Spermatheca       |                     | Thorax            |                     |
|--------|-------|---------------------|---------------------|-------------------|---------------------|-------------------|---------------------|-------------------|---------------------|-------------------|---------------------|-------------------|---------------------|
|        |       | Nr. of infections   | Avg. infection load | Nr. of infections | Avg. infection load | Nr. of infections | Avg. infection load | Nr. of infections | Avg. infection load | Nr. of infections | Avg. infection load | Nr. of infections | Avg. infection load |
| DWV    | QD S- | 13                  | 3.9                 | 13                | 5.2                 | 11                | 3.5                 | 15                | 5.5                 | 16                | 4.1                 | 13                | 3.4                 |
|        | QD S+ | 3                   | 3.1                 | 12                | 4.3                 | 2                 | 3.4                 | 13                | 4.9                 | 12                | 3.1                 | 3                 | 3.1                 |
| DWV    | QDS-  | 17                  | 4.2                 | 19                | 3.8                 | 2                 | 3.0                 | 19                | 4.5                 | 17                | 3.3                 | 3                 | 2.5                 |
| -B     | QDS+  | 15                  | 3.1                 | 19                | 3.1                 | 0                 | -                   | 20                | 4.6                 | 17                | 4.4                 | 0                 | -                   |
